# Supplementary material for: A novel binary flooding system of a biobased surfactant and hydrophobically associating polymer with ultralow interfacial tensions
Source: Royal Society of Chemistry journal article supplement (doi:10.1039/c8ra02901f), 2018-01-01
Supplement: c8ra02901f1.pdf [file c8ra02901f1.pdf]

## **Electronic Supplementary Information**

### **A novel surfactant-polymer flooding system of the biobased zwitterionic surfactant and hydrophobically associating polymer with ultralow interfacial tensions**

Na Li, Xin-Ning Bao, Yong-Jun Guo, Shi-Zhong Yang, Ying-Cheng Li \* and Bo-Zhong Mu \*  
State Key Laboratory of Bioreactor Engineering and Institute of Applied Chemistry, East China  
University of Science and Technology, Shanghai 200237, P.R. China

\*Corresponding Author: Bo-Zhong Mu, E-mail: [bzmu@ecust.edu.cn](mailto:bzmu@ecust.edu.cn)

Phone: +86 21 64252063; Fax: +86 21 64252485

Ying-Cheng Li, E-mail: [liyc.sshy@sinopec.com](mailto:liyc.sshy@sinopec.com)

## 1. Material

Daqing oil sands (specific surface area of 1.43 m<sup>2</sup>/g), Daqing crude oil (a density of 0.85 g/cm<sup>3</sup>, viscosity of 19.81 mPa at 45 °C). Other materials were all analytical reagents. All of the aqueous solutions used in this study were prepared with simulated formation water (Table 1).

**Table 1 The formation of simulate formation water**

| Substance                       | Concentration (mg/L) |
|---------------------------------|----------------------|
| NaHCO <sub>3</sub>              | 3176.0               |
| NaCl                            | 1597.1               |
| Na <sub>2</sub> CO <sub>3</sub> | 381.6                |
| CaCl <sub>2</sub>               | 112.7                |
| MgCl <sub>2</sub>               | 42.8                 |
| Na <sub>2</sub> SO <sub>4</sub> | 17.0                 |

## 2. Methods

### 2.1 Interfacial tension measurement

The interfacial tension was measured by a spinning drop interfacial tensiometer, TX500C. The measuring range of TX500C is 100 mN/m -10<sup>-5</sup> mN/m. A capillary tube filled with surfactant solution and a fresh drop of crude oil, was spun at 4500 rpm. Unless otherwise specified, the temperature was 45 °C in this study. The measure time is one hour for the POAPMB solutions and two hours for POAPMB/AP-P3 system. The interfacial tension between Daqing crude oil and simulated formation water was 9.90 mN/m at 45 °C.

### 2.2 Dilution resistance measurement

The POAPMB/AP-P3 system was mixed with simulated formation water at the volume ratio of 1:1, 1:2, 1:3...1:8. After mixing, the interfacial tension with crude oil was measured at 45 °C to determine the dilution resistance of the system. The initial concentration of surfactant was 0.50 g/L, and AP-P3 was 1.50 g/L.

### 2.3 Adsorption resistance measurement

The solutions with a surfactant concentration of 0.50 g/L and with an AP-P3 concentration of 1.50 g/L were prepared. The solutions (8.00 g) and oil sands (0.89 g) were mixed in 10 mL colorimetric tube. Shaking them at 45 °C for 24 h by shaking water bath SW22. The supernatants were collected by centrifuge 3-18 (5000 rpm, 5 min), then measured IFT between Daqing crude oil and the supernatants. If the value of IFT was below 0.01 mN/m, fresh sands were added to the remaining supernatants at the weight fraction ratio of 0.1/0.9. Repeat the above operation until the IFT of the solution is above 0.01 mN/m. The resistance of a surfactant formulation against adsorption were evaluated by the total number of times that an ultralow IFT was achieved.

### 2.4 Viscosity stability measurement

The viscosity stability of SP flooding was determined under the conditions of 45 °C, shear rates 7.34 s<sup>-1</sup> by Programmable Rheometer DV-III. The accuracy of Programmable Rheometer DV-III is the plus or minus one percent of the result of the measurement.

### 2.5 Phase behavior study

The solution and crude oil were preheated to 45 °C, then 25 mL of crude oil and 25 mL of POAPMB/AP-P3 system were mixed in a 50 mL colorimetric tube and shaken by hand for 5 minutes. An emulsion was formed and allowed to settle at 45 °C, and equilibrium was assumed when there was no observable change in the phase levels. The final observed levels were recorded.

### 2.6 Particle size and Zeta potential

Particle size and Zeta potential were measured using Zetasizer procured from Malvern instruments, Model ZEN3690, USA at 45 °C.

## 3. Results of interfacial properties

### 3.1 Interfacial tension

Dynamic interfacial tensions (average of three measurements) between Daqing crude oil and different concentrations of surfactant solutions alone and in the presence of 1.50 g/L AP-P3 were showed in Fig. 1a and 1b.

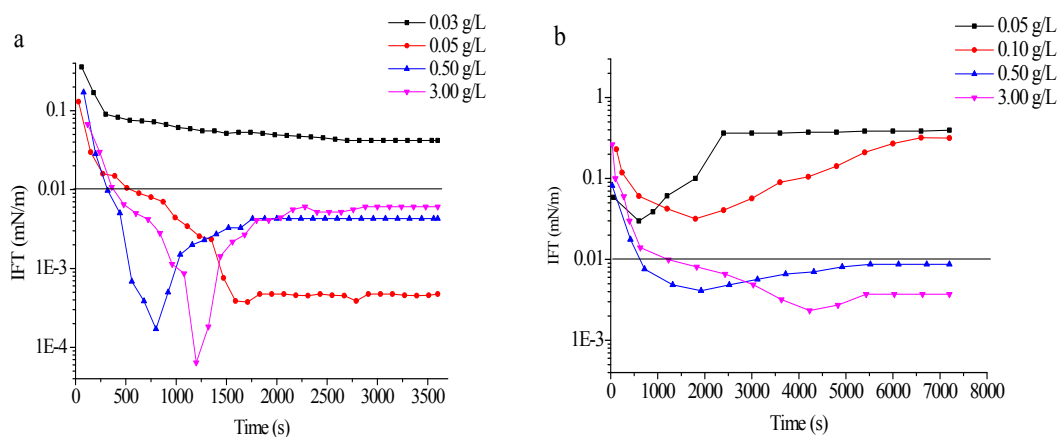

Figure 1. The IFT between crude oil and different concentrations of POAPMB solutions (a) and in the presence of 1.50 g/L AP-P3 (b)

### 3.2 Effect of temperature

Fig.2 showed IFTs (average of three measurements) of surfactant solution and POAPMB/AP-P3 system at different temperatures. The concentrations of POAPMB and AP-P3 in binary system were 0.50 g/L and 1.50 g/L, respectively.

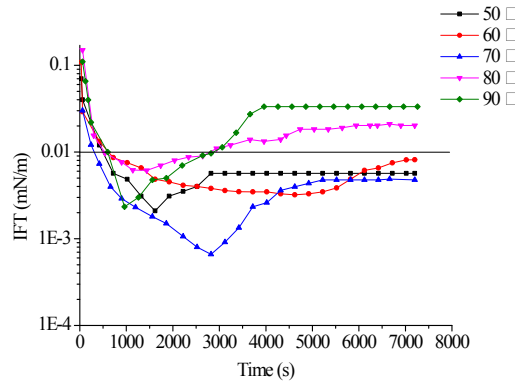

Figure 2. Effect of temperature on the IFTs between crude oil and POAPMB/AP-P3 system

### 3.3 Effect of salt

The effect of NaCl and Ca<sup>2+</sup> concentration on IFTs (average of three measurements) was showed in Fig. 3 and Fig. 4. The concentrations of POAPMB and AP-P3 in binary system were 0.50 g/L and 1.50 g/L, respectively.

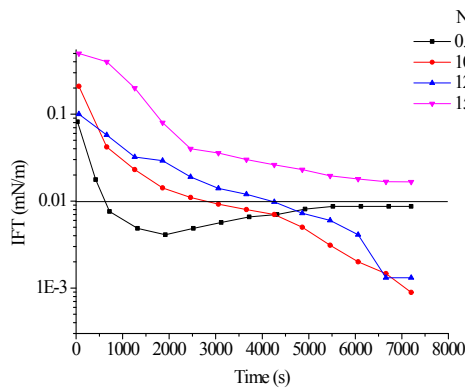

Figure 3. Effect of concentrations of NaCl on the IFTs between crude oil and POAPMB/AP-P3 system

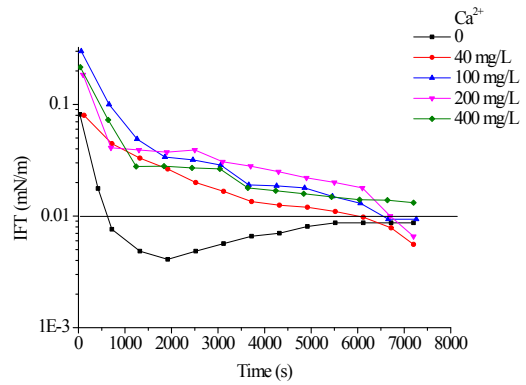

Figure 4. Effect of concentrations of Ca<sup>2+</sup> on the IFTs between crude oil and POAPMB/AP-P3 system

### 3.4 Dilution performance

Table 2 showed the IFTs of 3.00 g/L POAPMB solution with 1.50 g/L AP-P3 after dilution against crude oil.

Table 2 The minimum IFTs and the equilibrium IFTs between crude oil and the aqueous solutions after dilution

| Dilution multiple | 3.0 g/L                        | 3.0 g/L                        |
|-------------------|--------------------------------|--------------------------------|
|                   | POAPMB                         | POAPMB                         |
|                   | +1.5 g/L AP-P3                 | +1.5 g/L AP-P3                 |
| 1                 | $(2.3 \pm 0.4) \times 10^{-4}$ | $(4.1 \pm 0.4) \times 10^{-3}$ |
| 2                 | $(4.2 \pm 0.5) \times 10^{-4}$ | $(5.6 \pm 0.5) \times 10^{-3}$ |
| 3                 | $(4.1 \pm 0.3) \times 10^{-4}$ | $(4.3 \pm 0.3) \times 10^{-3}$ |
| 4                 | $(3.8 \pm 0.4) \times 10^{-4}$ | $(2.5 \pm 0.2) \times 10^{-3}$ |
| 5                 | $(3.9 \pm 0.3) \times 10^{-4}$ | $(3.6 \pm 0.2) \times 10^{-3}$ |
| 6                 | $(5.7 \pm 0.6) \times 10^{-4}$ | $(2.6 \pm 0.3) \times 10^{-3}$ |
| 7                 | $(3.2 \pm 0.5) \times 10^{-4}$ | $(6.7 \pm 0.4) \times 10^{-3}$ |
| 8                 | $(2.5 \pm 0.4) \times 10^{-4}$ | $(7.9 \pm 0.3) \times 10^{-4}$ |
| 9                 | $(5.5 \pm 0.5) \times 10^{-4}$ | $(3.4 \pm 0.2) \times 10^{-3}$ |

|    |                              |                              |
|----|------------------------------|------------------------------|
| 10 | $(1.4\pm 0.3)\times 10^{-5}$ | $(3.5\pm 0.4)\times 10^{-4}$ |
| 20 | $(1.6\pm 0.4)\times 10^{-4}$ | $(3.1\pm 0.2)\times 10^{-3}$ |
| 30 | $(2.9\pm 0.3)\times 10^{-4}$ | $(2.9\pm 0.3)\times 10^{-4}$ |
| 40 | $(4.5\pm 0.6)\times 10^{-3}$ | $(4.5\pm 0.4)\times 10^{-3}$ |
| 50 | $(4.3\pm 0.4)\times 10^{-2}$ | $(4.3\pm 0.3)\times 10^{-2}$ |

### 3.5 Resistance against adsorption by Daqing oil sands

Table 3 showed the IFTs of 3.00 g/L POAPMB solution with 1.50 g/L AP-P3 after adsorptions against crude oil.

**Table 3 The IFT<sub>min</sub> and IFT<sub>equ</sub> between crude oil and the aqueous solutions after adsorption (45 °C)**

| Days | 3.0 g/L                      | 3.0 g/L                      |
|------|------------------------------|------------------------------|
|      | POAPMB<br>+1.5 g/L AP-P3     | POAPMB<br>+1.5 g/L AP-P3     |
|      | IFT <sub>min</sub> (mN/m)    | IFT <sub>equ</sub> (mN/m)    |
| 1    | $(4.1\pm 0.4)\times 10^{-3}$ | $(4.1\pm 0.4)\times 10^{-3}$ |
| 2    | $(1.0\pm 0.2)\times 10^{-3}$ | $(5.1\pm 0.1)\times 10^{-3}$ |
| 3    | $(7.0\pm 0.3)\times 10^{-3}$ | $(7.0\pm 0.3)\times 10^{-3}$ |
| 4    | $(5.4\pm 0.4)\times 10^{-2}$ | $(8.8\pm 0.2)\times 10^{-2}$ |

## 4. Results of viscosity properties

### 4.1 Dilution performance

Table 4 showed the viscosity of 0.50 g/L POAPMB solution with 1.50 g/L AP-P3 after dilution.

**Table 4 The viscosity of POAPMB/AP-P3 system diluted (45 °C)**

| Dilution multiple | 1        | 2        | 3       | 4       | 5       | 6       | 7       | 8       | 9       |
|-------------------|----------|----------|---------|---------|---------|---------|---------|---------|---------|
| Viscosity (mPa·s) | 46.8±0.4 | 15.7±0.2 | 8.9±0.1 | 6.5±0.1 | 5.9±0.1 | 4.3±0.1 | 3.9±0.1 | 3.6±0.1 | 3.4±0.1 |

### 4.2 Resistance against adsorption by Daqing oil sands

Table 5 showed the viscosity of 0.50 g/L POAPMB solution with 1.50 g/L AP-P3 after adsorption.

**Table 5 The viscosity of POAPMB/AP-P3 system after adsorption (45 °C)**

| Adsorption times  | 0        | 1        | 2        | 3        |
|-------------------|----------|----------|----------|----------|
| Viscosity (mPa·s) | 46.8±0.4 | 44.3±0.2 | 43.7±0.3 | 42.8±0.2 |

### 4.3 Effect of temperature

Table 6 showed the viscosity of 0.50 g/L POAPMB solution with 1.50 g/L at different temperature.

**Table 6 Effect of temperature on the viscosity of POAPMB/AP-P3 system**

| Temperature (°C)  | 50       | 60       | 70       | 80       | 90       |
|-------------------|----------|----------|----------|----------|----------|
| Viscosity (mPa·s) | 39.7±0.3 | 36.3±0.3 | 32.8±0.3 | 29.5±0.2 | 25.1±0.1 |

### 4.4 Effect of salt

Table 7 and Table 8 showed the viscosity of 0.50 g/L POAPMB solution with 1.50 g/L at different concentrations of . NaCl and Ca<sup>2+</sup>.

**Table 7 Effect of the concentration of NaCl on the viscosity of POAPMB/AP-P3 system (45 °C)**

| The concentration of NaCl (g/L) | 0        | 10       | 12.5     | 15       |
|---------------------------------|----------|----------|----------|----------|
| Viscosity (mPa·s)               | 46.8±0.4 | 27.5±0.2 | 25.9±0.2 | 24.8±0.2 |

**Table 8 Effect of the concentration of Ca<sup>2+</sup> on the viscosity of POAPMB/AP-P3 system (45 °C)**

| The concentration of Ca <sup>2+</sup> (mg/L) | 0        | 40       | 100      | 200      | 400      |
|----------------------------------------------|----------|----------|----------|----------|----------|
| Viscosity (mPa·s)                            | 46.8±0.4 | 42.1±0.3 | 41.5±0.2 | 35.9±0.2 | 26.2±0.1 |

## 5. Particle size and Zeta potential

Table 9 and Table 10 showed Particle size and Zeta potential results of solutions.

**Table 9 Particle size at 45 °C**

| Solution                     | Peak 1 (nm) | Intensity% | Peak 2 (nm) | Intensity% |
|------------------------------|-------------|------------|-------------|------------|
| 0.5 g/L POAPMB               | 13.7±0.1    | 100        | -           | -          |
| 1.5 g/L AP-P3                | 43.4±6.1    | 100        | -           | -          |
| 0.5 g/L POAPMB+1.5 g/L AP-P3 | 14.5±1.5    | 13.5       | 100.1±8.9   | 86.5       |
| Middle microemulsion         | 144.1±9.5   | 100        | -           | -          |
| Bottom phase                 | 40.4±9.3    | 33.7       | 212.3±19.9  | 66.3       |

**Table 10 Particle size at 45 °C**

| Solution             | ZP (mV)  |
|----------------------|----------|
| Middle microemulsion | 50.4±2.4 |

## 6. Previous result

The previous results cited in the paper are summarized in Table 11.

**Table 11 Previous result**

| Solution                                                                                        | State                                                              |
|-------------------------------------------------------------------------------------------------|--------------------------------------------------------------------|
| 2.5 g/L sugar-based anionic-nonionic surfactant                                                 | achieved ultralow IFT <sup>15</sup>                                |
| 5 mM nonionic + 1.00 g/L polyacrylamide                                                         | can't achieve ultralow IFT <sup>10</sup>                           |
| 0.3~10 mM nonionic surfactant mixed sulfobetaine + 1.00 g/L polyacrylamide                      | achieved ultralow IFT <sup>10</sup>                                |
| gemini-non-ionic mixed surfactant (total 3.00 g/L) + hydrophobically associating polyacrylamide | achieved ultralow IFT after aging for 90 days <sup>5</sup>         |
| nonionic/zwitterionic formulation (total 7.50 mM, mole ratio 1/1) + 1.00 g/L polyacrylamide     | achieved the ultralow IFT after adsorption four times <sup>2</sup> |
| 0.50 g/L fatty acid disulfonate+1.75 g/L hydrophobically associating polyacrylamide             | 67% the initial viscosity retention rate. <sup>5</sup>             |
